# Supplementary material for: Aortopulmonary Fistula after Multiple Pulmonary Artery Stenting and Dilatation for Postarterial Switch Supravalvular Stenosis
Source: Case Rep Cardiol. 2015 May 13;2015:371925. doi: 10.1155/2015/371925 (PMC4444557; doi:10.1155/2015/371925)
Supplement: Supplementary file 1 — Video 1. Aortography with contrast injection in the ascending aorta showing simultaneous opacification of the aorta and the right pulmonary artery, establishing the diagnosis of aortopulmonary window. Video 2. Trans-thoracic short axis view, performed 16 months prior to the current admission, showing flow aliasing in the axis of the main and right pulmonary artery. [file 371925.f1.zip]

Archive with 3 entries (2 files):
- 371925.f1/
- 371925.f1/371925.r2.attachment.mov
- 371925.f1/mat.371925.v1.mov
